# Supplementary material for: Thiazolidine-2,4-dione framework containing spiropyrrolidine-oxindole and 1,2,3-triazole scaffold: synthesis, in vitro α-amylase inhibition and in silico studies
Source: Royal Society of Chemistry journal article supplement (doi:10.1039/d2nj05059e), 2023-01-01
Supplement: d2nj05059e1.pdf [file d2nj05059e1.pdf]

**New Journal of Chemistry**

**Thiazolidine-2,4-dione framework containing spiro pyrrolidine-oxindole and 1,2,3-triazole scaffold:  
Synthesis, *in vitro*  $\alpha$ -amylase inhibition and *insilico* studies**

**Meenakshi Duhan<sup>a</sup>, Rahul Singh<sup>a</sup>, Meena Devi<sup>a</sup>, Jayant Sindhu<sup>b</sup>, Parvin Kumar<sup>a,\*</sup>, Sudhir Kumar<sup>c</sup>,  
Ramesh Kataria<sup>d</sup>, Ashwani Kumar<sup>e</sup>, Sohan Lal<sup>a</sup>, Devender Singh<sup>f</sup>**

<sup>a</sup>Department of Chemistry, Kurukshetra University, Kurukshetra-136119, INDIA

<sup>b</sup>Department of Chemistry, COBS&H, CCS HAU, Hisar-125004, INDIA

<sup>c</sup>Department of MBB&B, COBS&H, CCS HAU, Hisar-125004, INDIA

<sup>d</sup>Department of Chemistry and Centre for Advance Studies in Chemistry, Panjab University, Chandigarh-160014, INDIA

<sup>e</sup>Department of Pharmaceutical Sciences, Guru Jambheshwar University of Science and Technology, Hisar, Haryana- 125001, INDIA

<sup>f</sup>Department of Chemistry, Maharshi Dayanand University, Rohtak, Haryana-124001, INDIA

Email:- [parvinjangra@gmail.com](mailto:parvinjangra@gmail.com)

## Supporting information

|                                              |    |
|----------------------------------------------|----|
| Figure S1: $^1\text{H}$ -NMR of 9a.....      | 3  |
| Figure S2: $^{13}\text{C}$ -NMR of 9a.....   | 4  |
| Figure S3: DEPT-135 of 9a .....              | 5  |
| Figure S4: DEPT- of 9a .....                 | 6  |
| Figure S5: $^1\text{H}$ -NMR of 9b.....      | 7  |
| Figure S6: $^{13}\text{C}$ -NMR of 9b.....   | 8  |
| Figure S7: $^1\text{H}$ -NMR of 9c.....      | 9  |
| Figure S8: $^{13}\text{C}$ -NMR of 9c.....   | 10 |
| Figure S9: $^1\text{H}$ -NMR of 9d.....      | 11 |
| Figure S10: $^{13}\text{C}$ -NMR of 9d.....  | 12 |
| Figure S11: $^1\text{H}$ -NMR of 9e.....     | 13 |
| Figure S12: $^{13}\text{C}$ -NMR of 9e.....  | 14 |
| Figure S13: $^1\text{H}$ -NMR of 9f .....    | 15 |
| Figure S14: $^{13}\text{C}$ -NMR of 9f ..... | 16 |
| Figure S15: $^1\text{H}$ -NMR of 9g.....     | 17 |
| Figure S16: $^{13}\text{C}$ -NMR of 9g.....  | 18 |
| Figure S17: $^1\text{H}$ -NMR of 9h.....     | 19 |
| Figure S19: HRMS of 9a. ....                 | 21 |

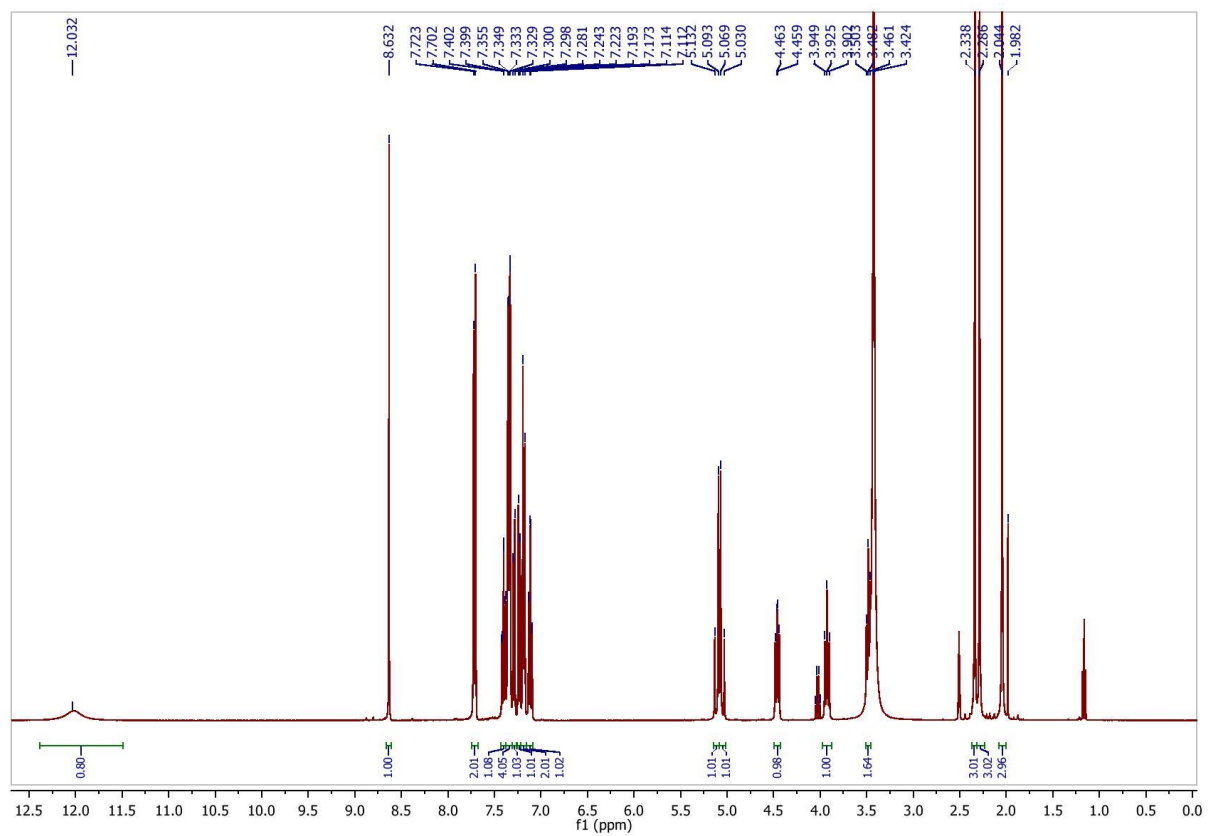

Figure S1:  $^1\text{H-NMR}$  of 9a

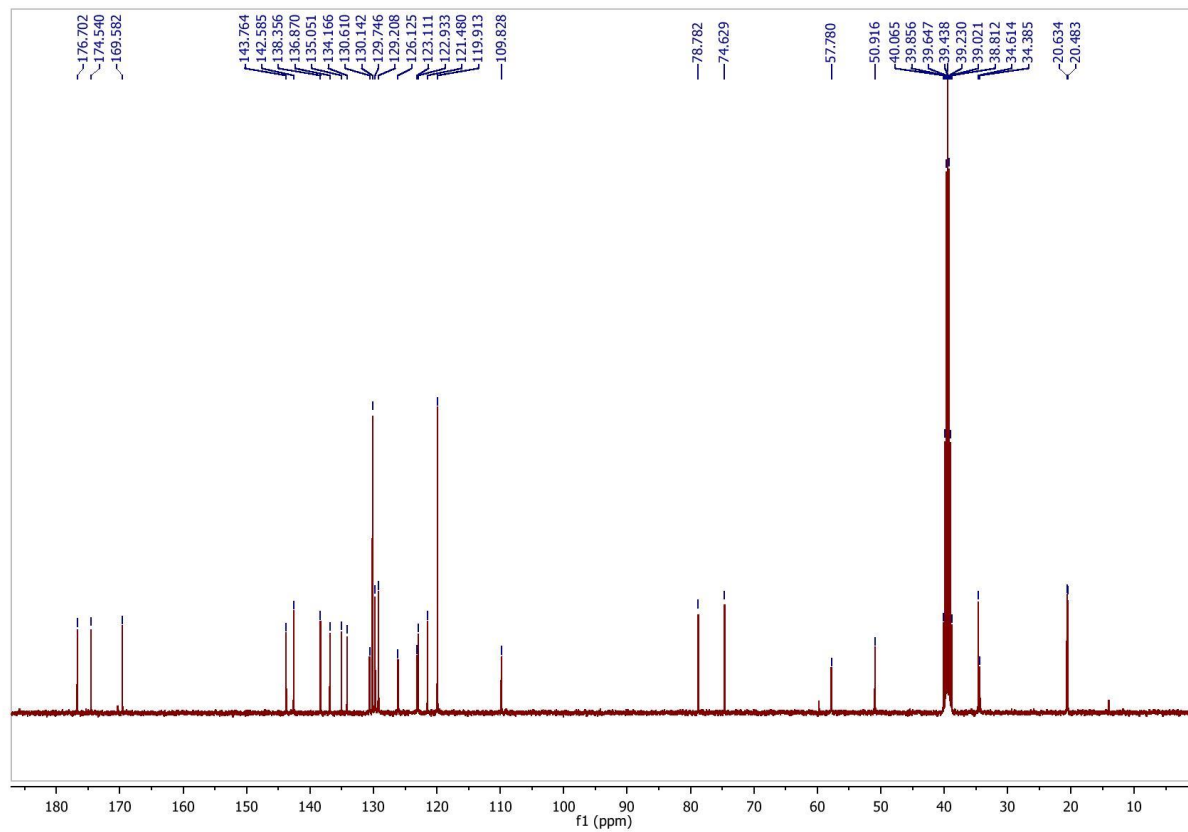

Figure S2:  $^{13}\text{C}$ -NMR of 9a

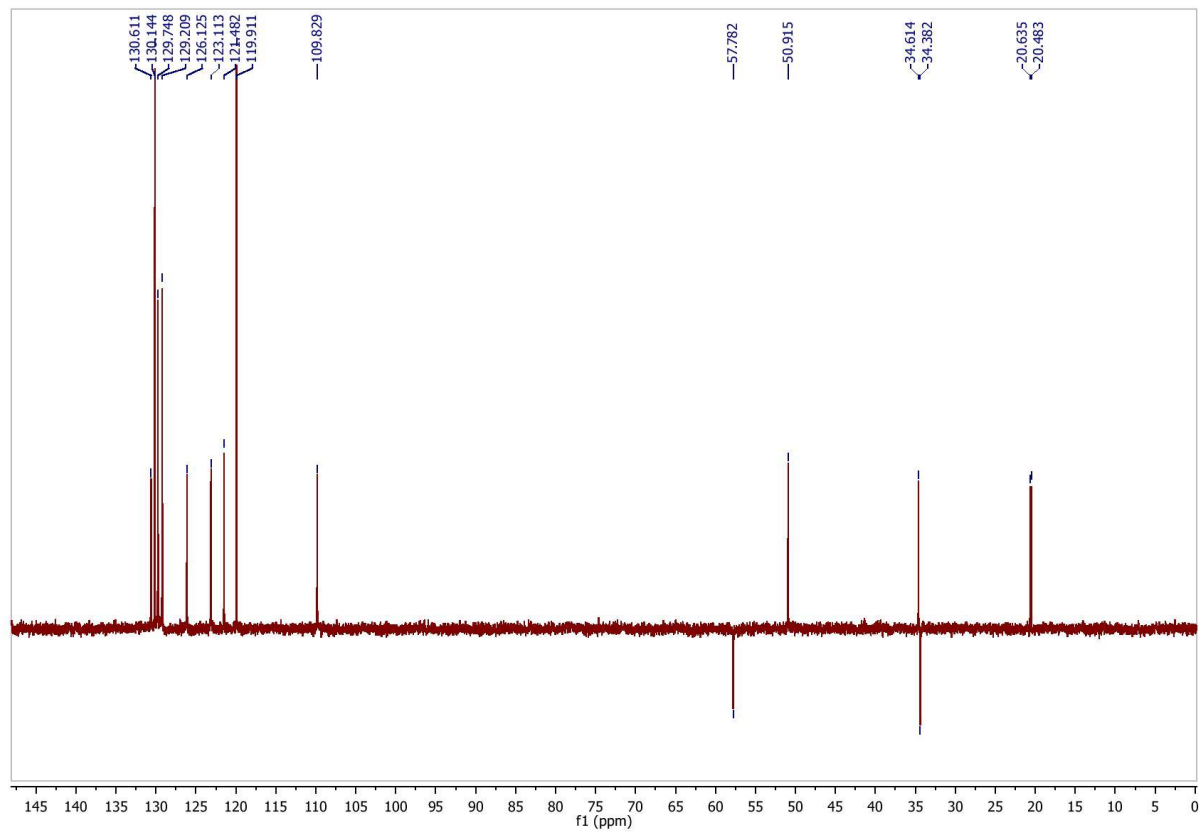

**Figure S3: DEPT-135 of 9a**

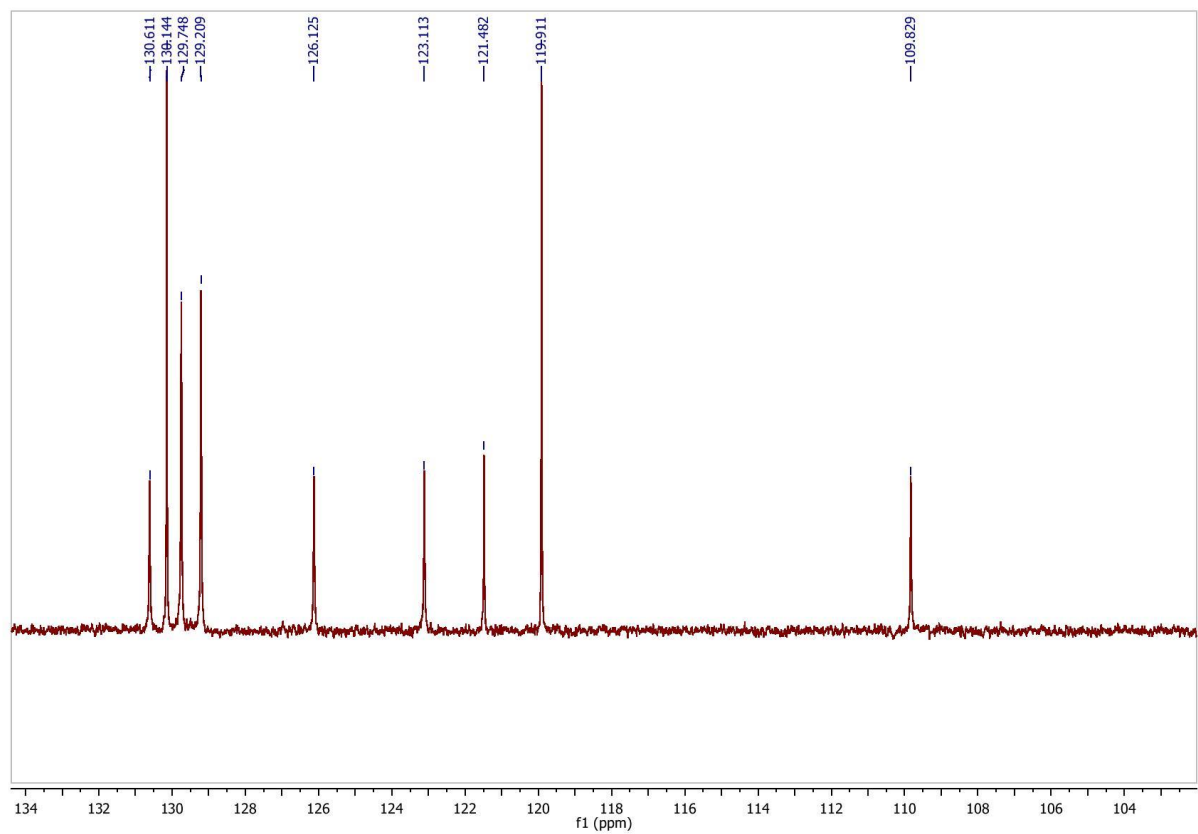

**Figure S4: DEPT- of 9a**

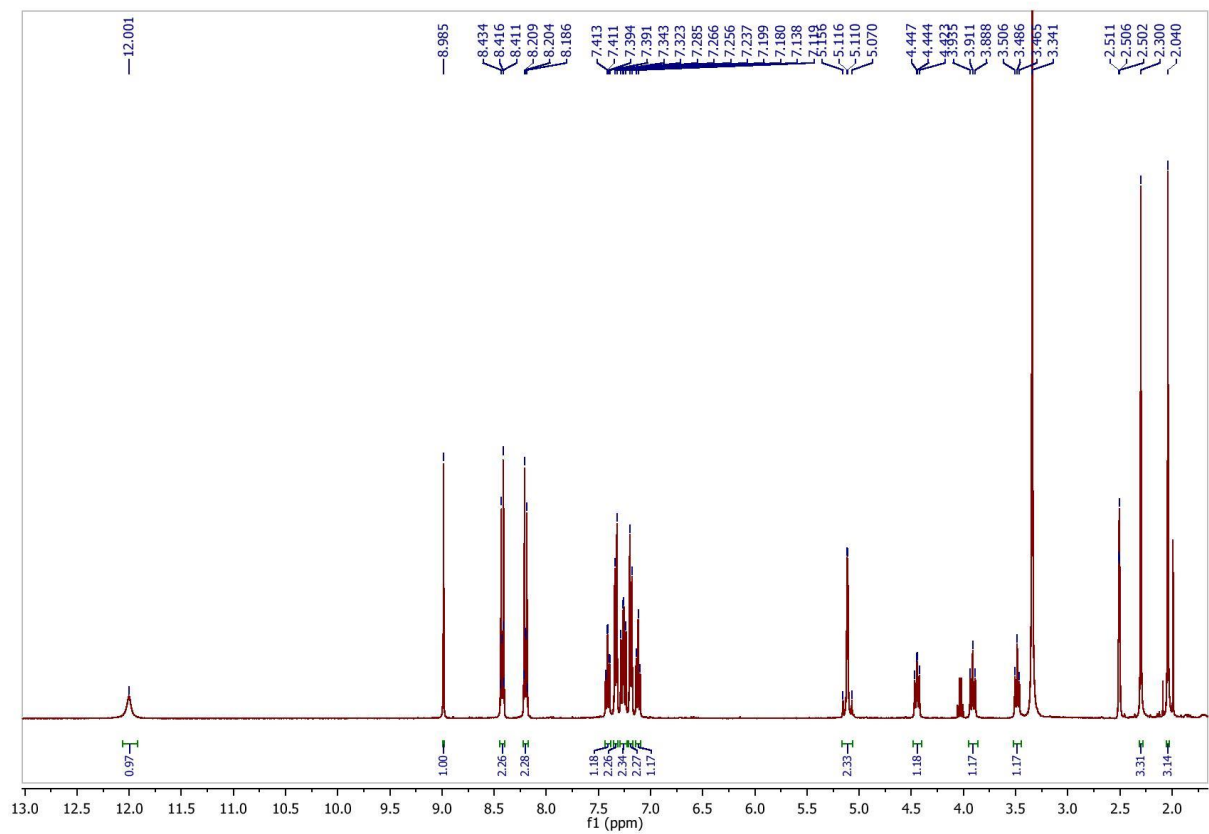

Figure S5: <sup>1</sup>H-NMR of 9b

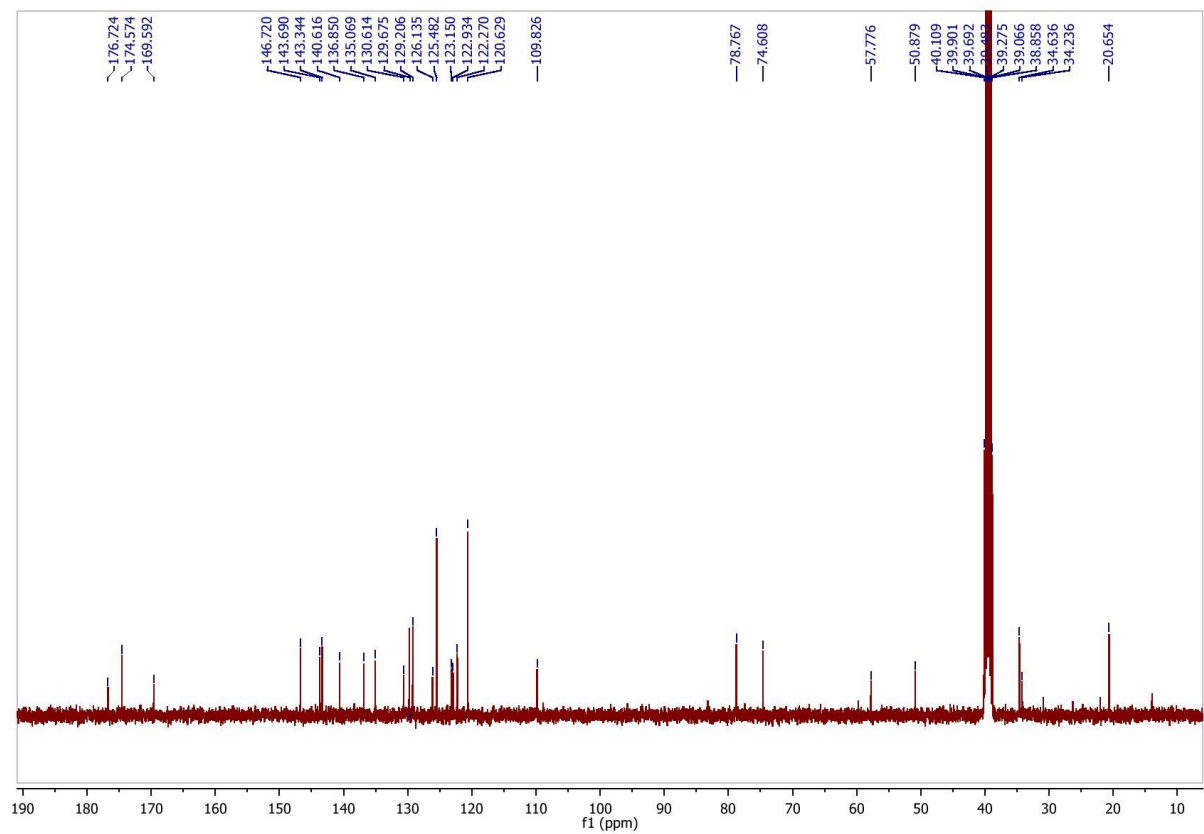

Figure S6:  $^{13}\text{C}$ -NMR of 9b



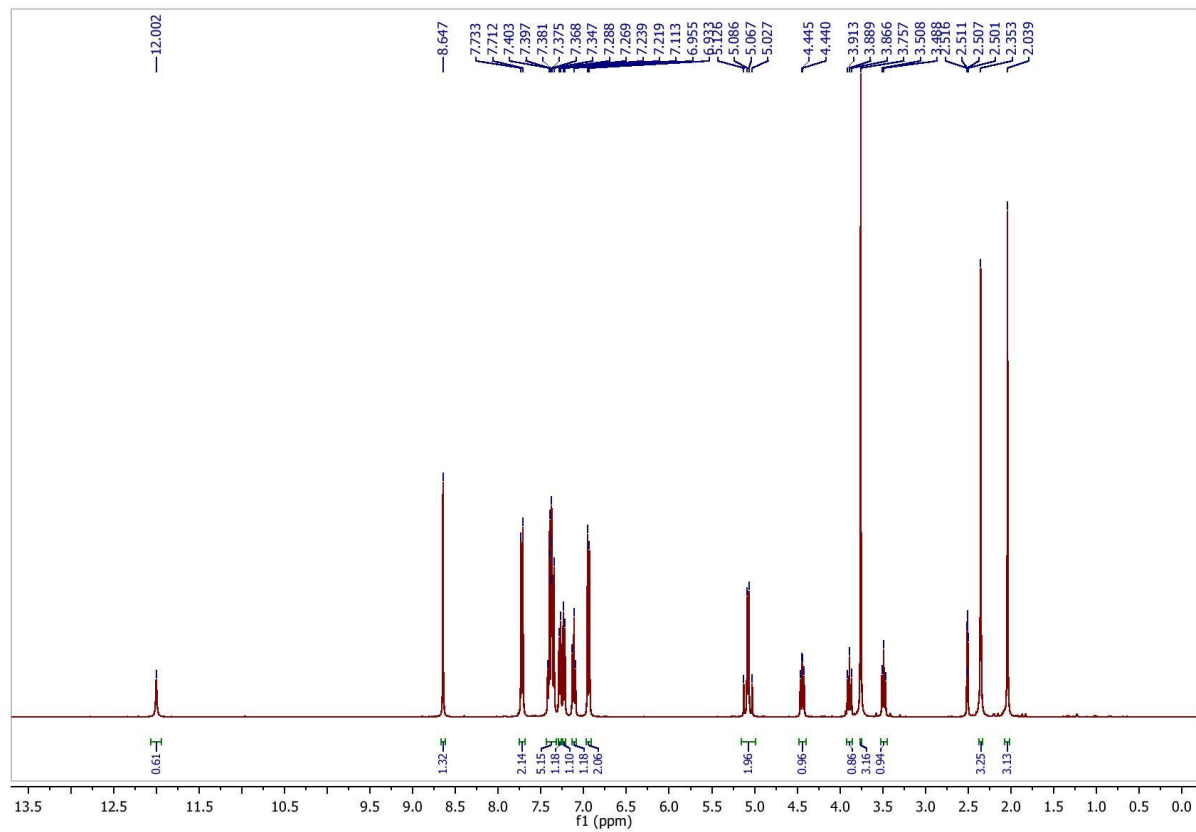

Figure S7:  $^1\text{H-NMR}$  of **9c**

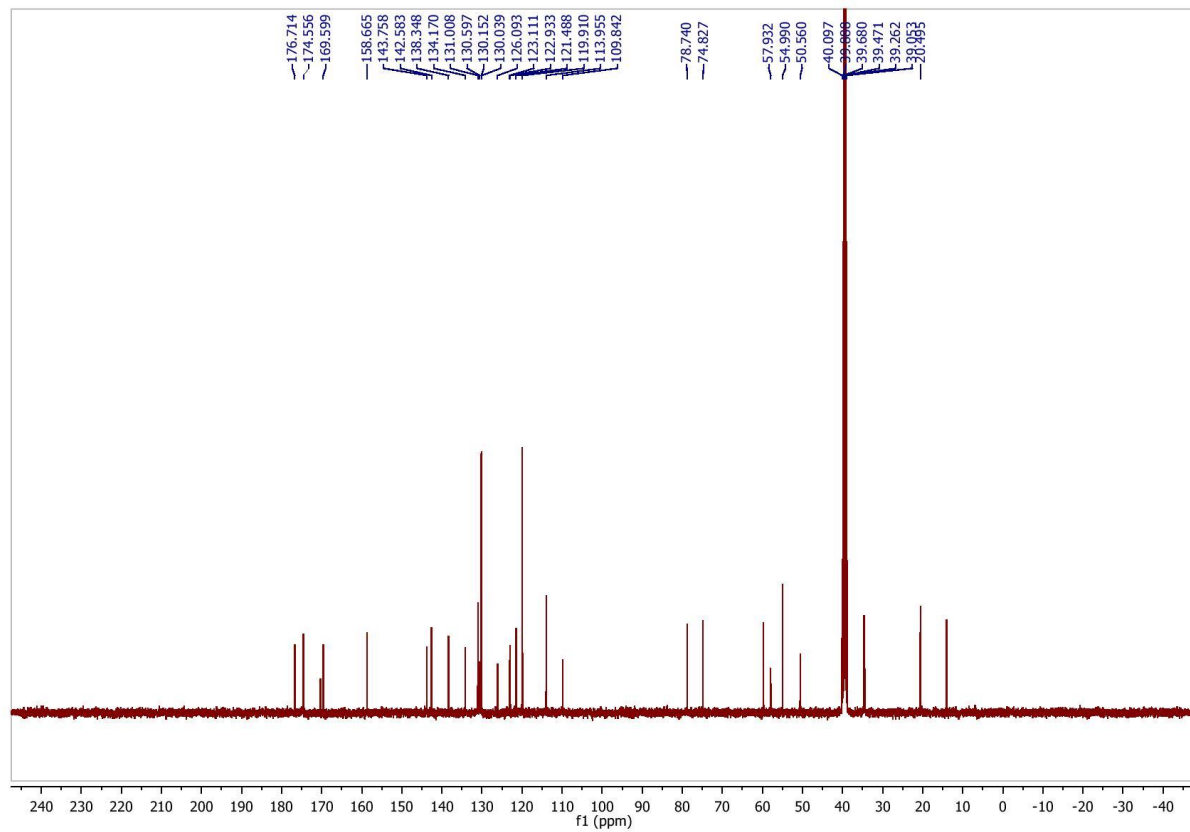

Figure S8:  $^{13}\text{C}$ -NMR of 9c

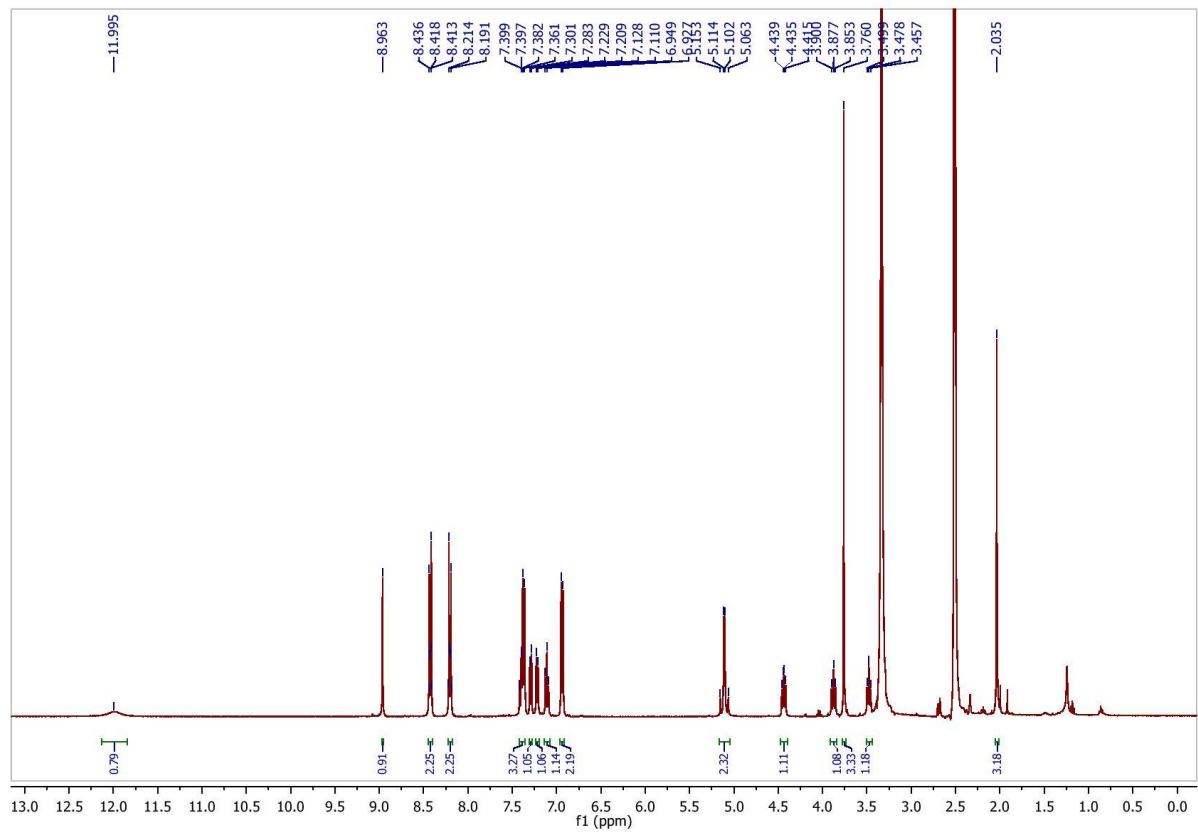

Figure S9:  $^1\text{H-NMR}$  of 9d

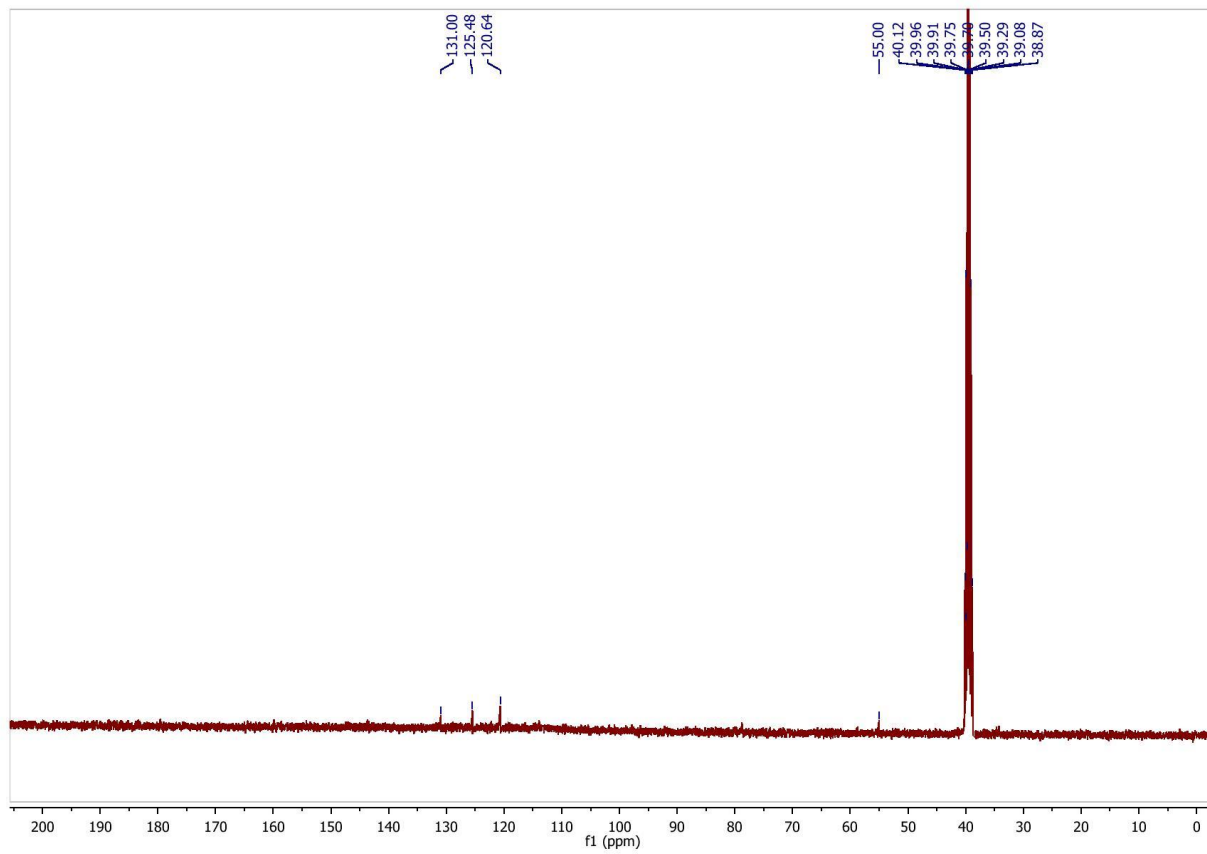

Figure S10:  $^{13}\text{C}$ -NMR of 9d

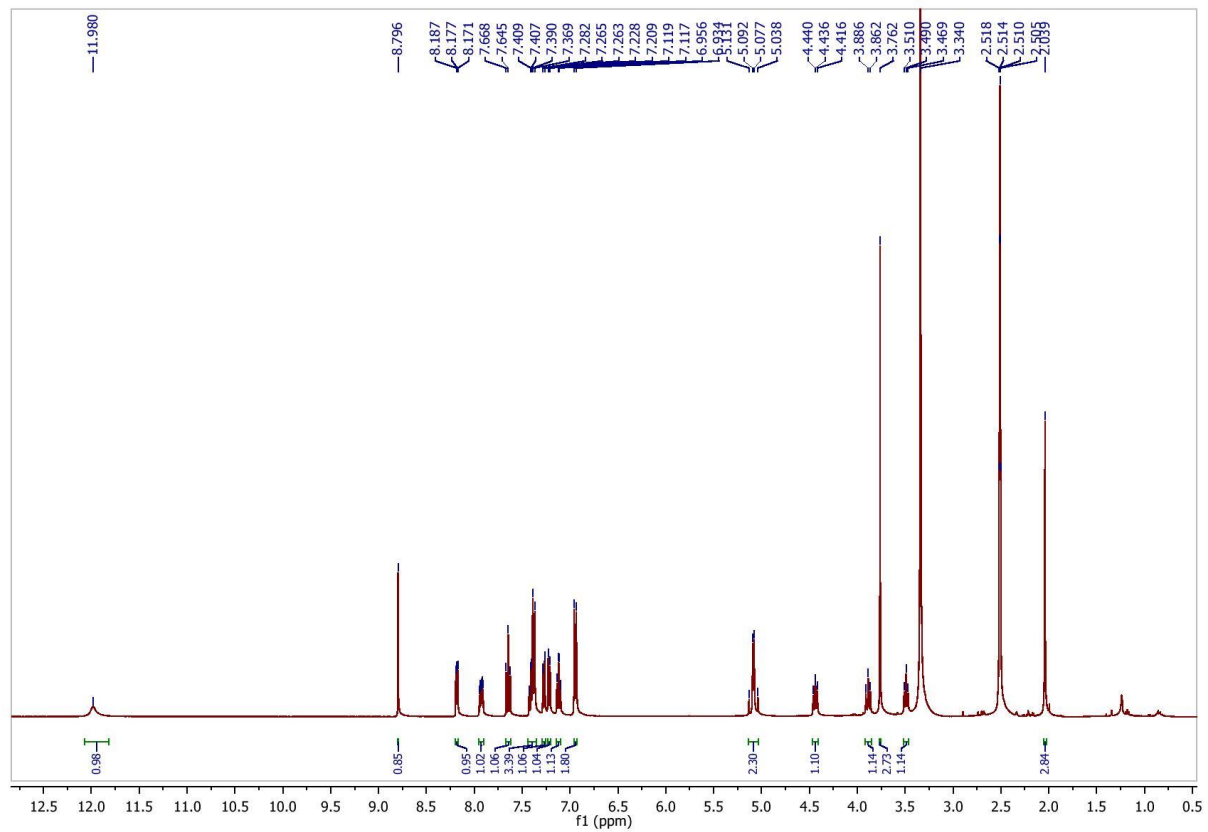

Figure S11: <sup>1</sup>H-NMR of 9e

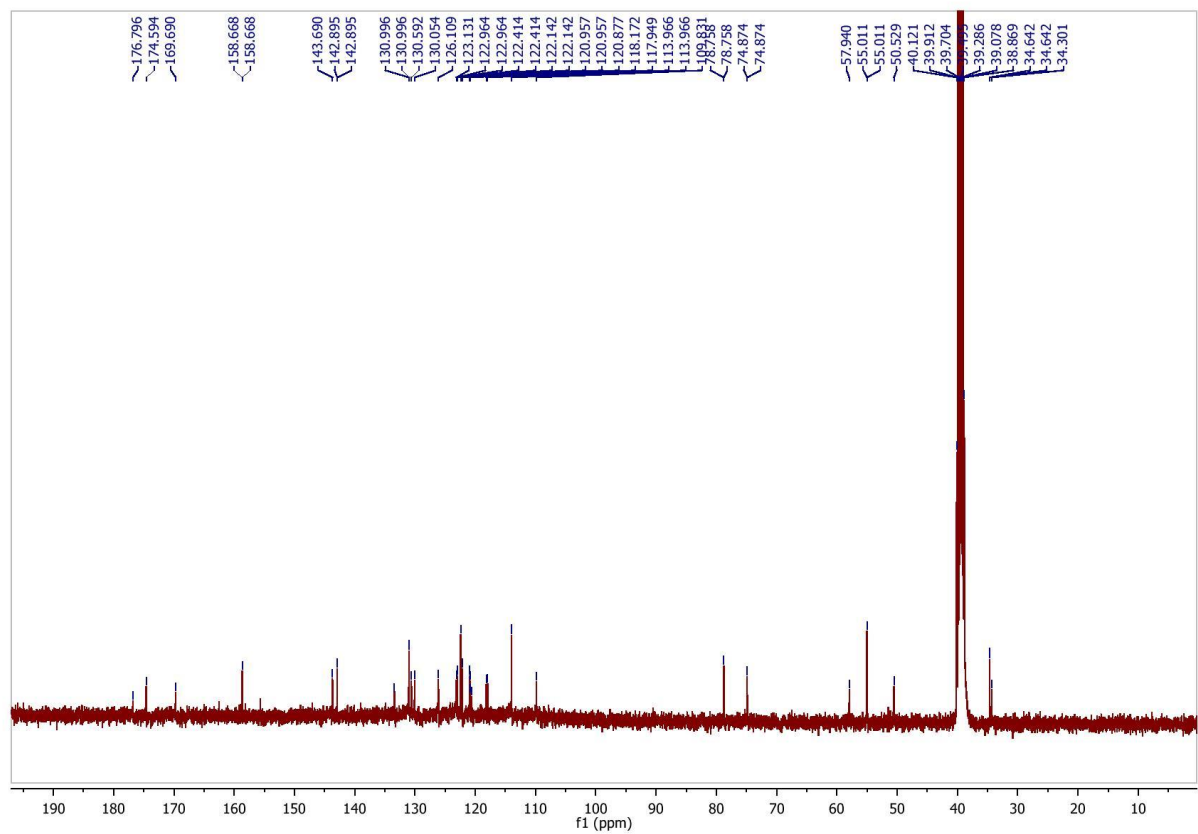

Figure S12:  $^{13}\text{C}$ -NMR of 9e

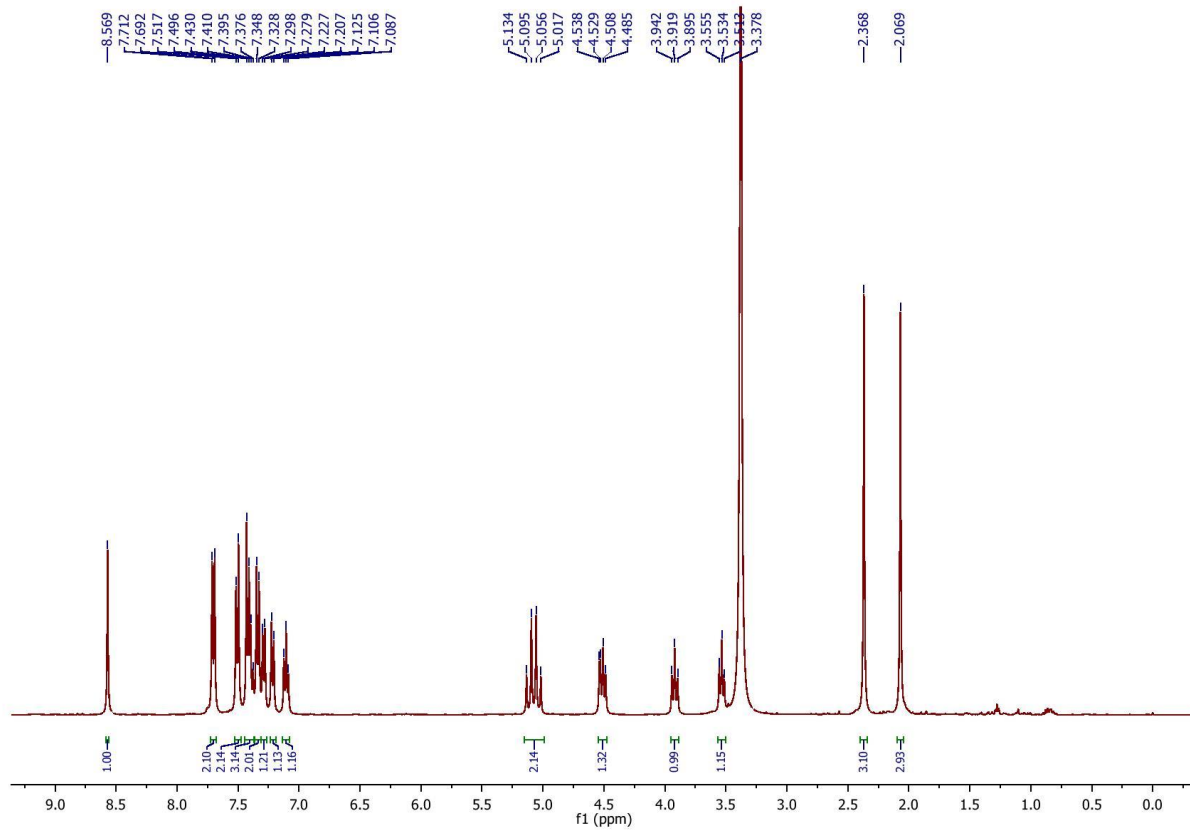

Figure S13:  $^1\text{H-NMR}$  of **9f**

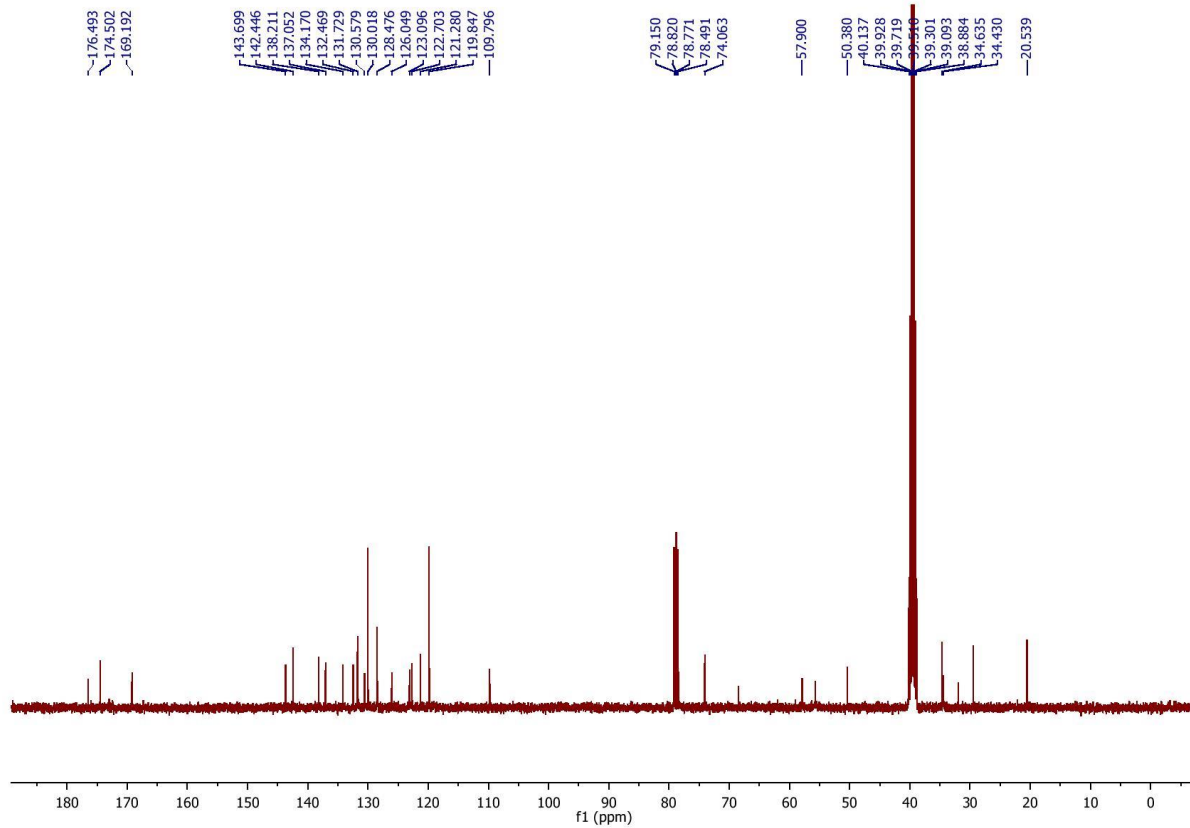

Figure S14:  $^{13}\text{C}$ -NMR of 9f



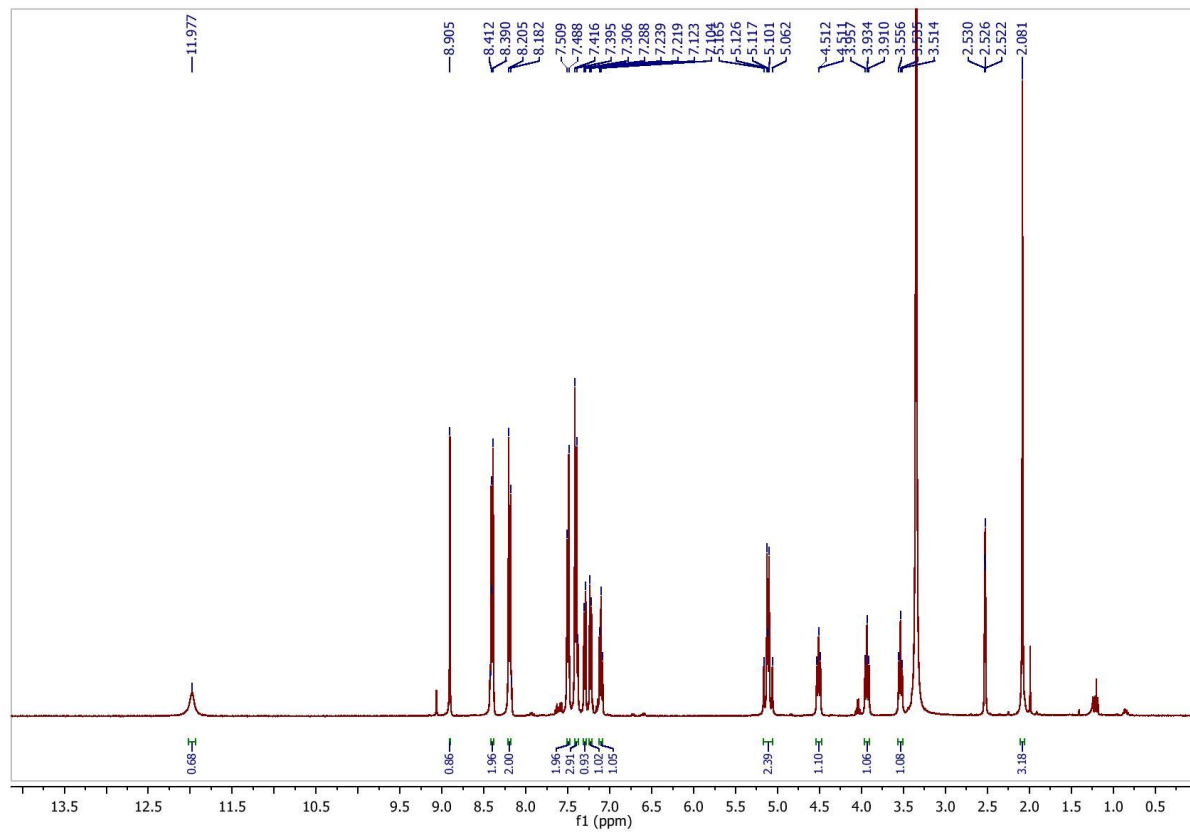

Figure S15:  $^1\text{H}$ -NMR of 9g

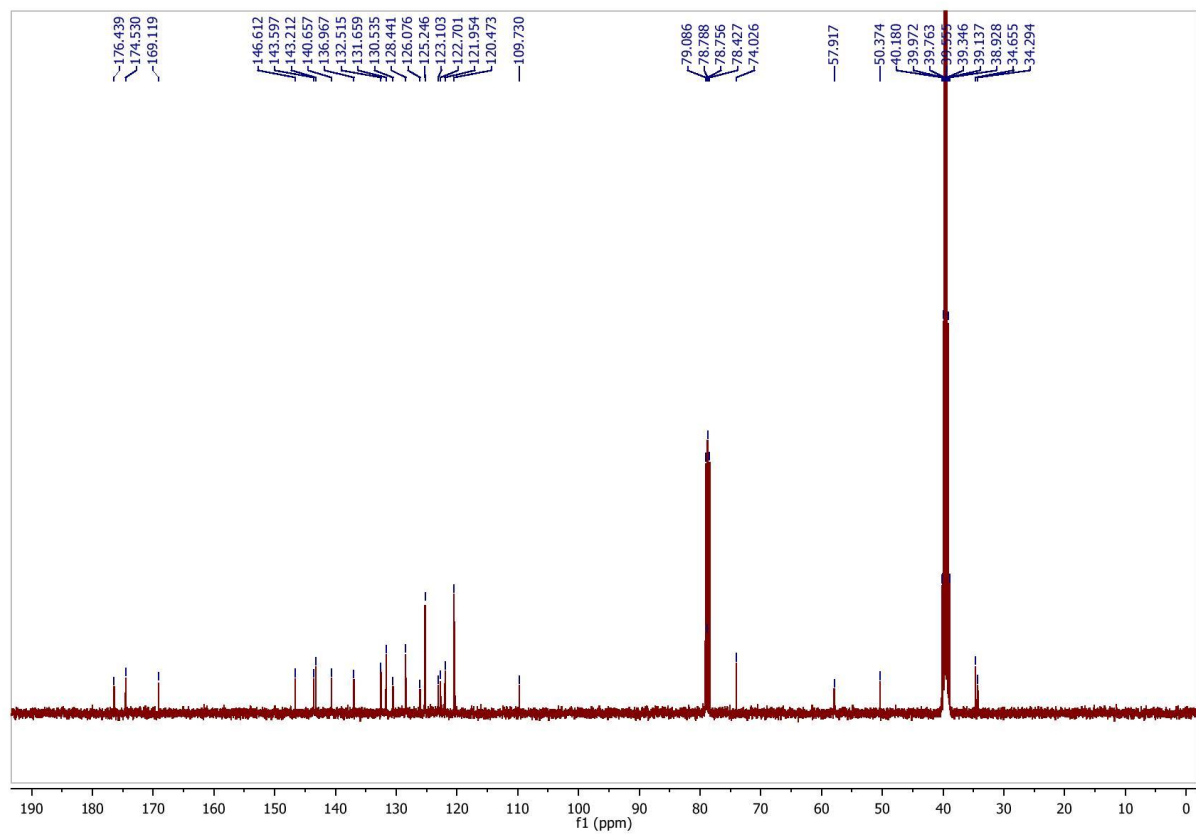

Figure S16:  $^{13}\text{C}$ -NMR of 9g

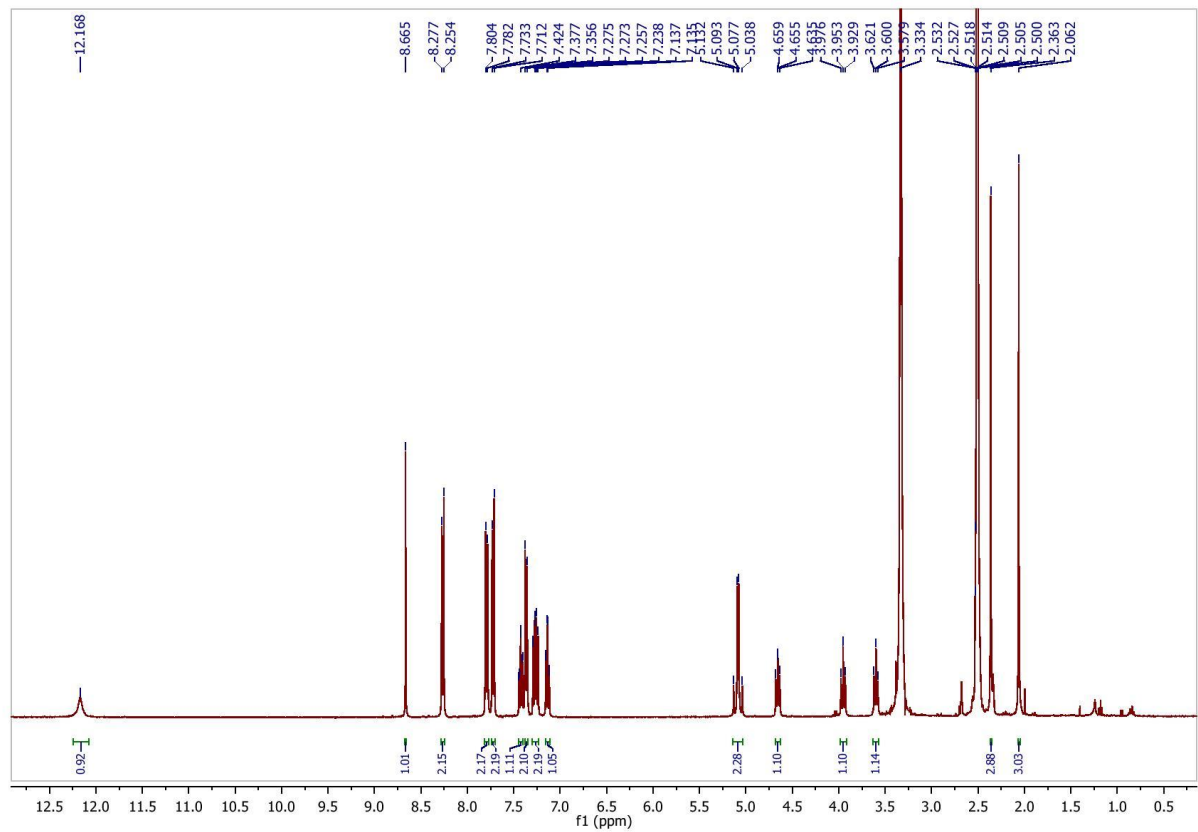

Figure S17:  $^1\text{H-NMR}$  of 9h

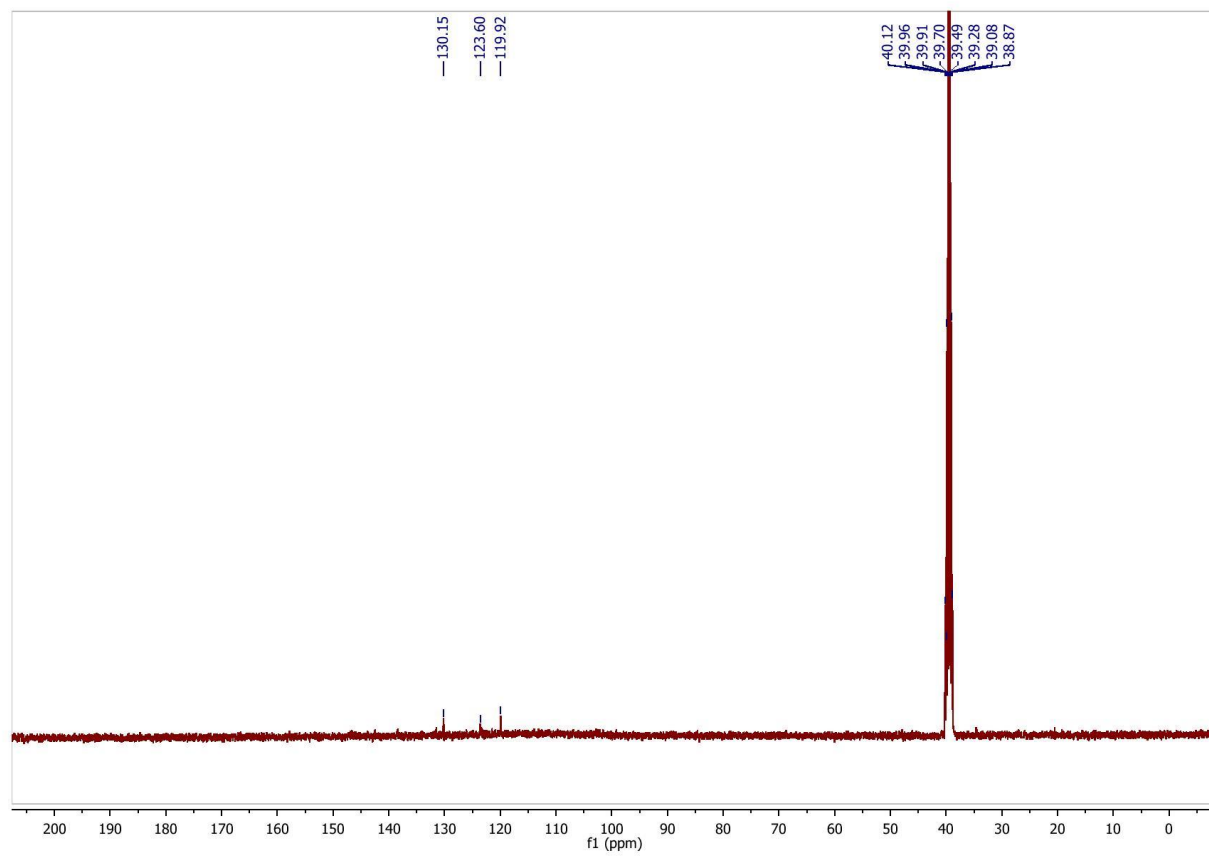

**Figure S18:**  $^{13}\text{C}$ -NMR of **9h**

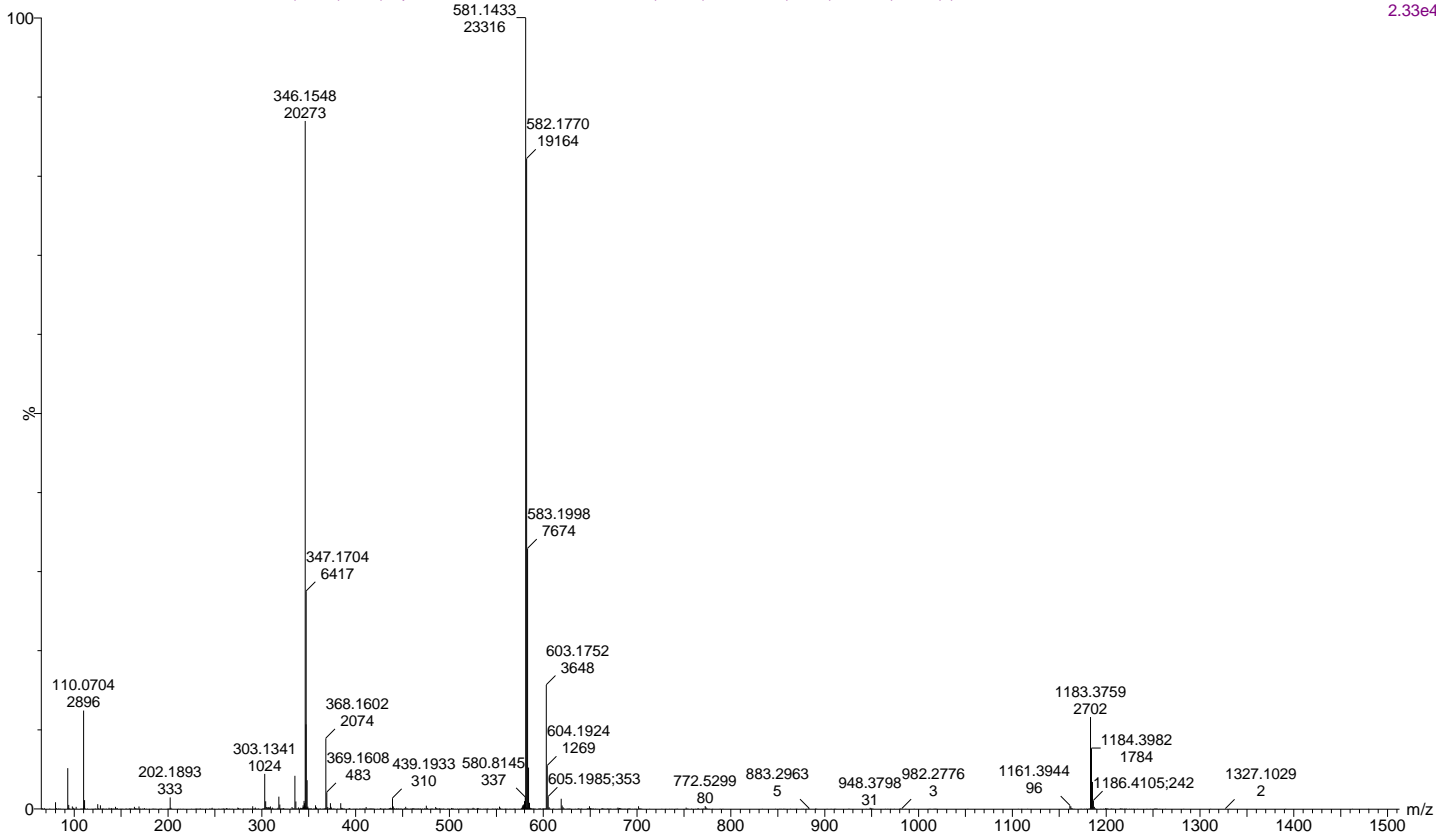

Figure S19: HRMS of 9a.
